# Supplementary material
Source: Research Square preprint supplement (doi:10.21203/rs.3.rs-9232134/v1)
Supplement: Supplementary file 1 [file 1d8fb35a4410ebc52eefd3bf.docx]

**Table 2: Mean scores (with standard errors) given by participants regarding their knowledge of ostrich production, welfare perceptions, the importance of husbandry practices, and how welfare aspects affect their purchasing decisions. Scores are on a 1 to 5 scale, from least to most knowledgeable, important, or likely. Responses covered the full range of the scale for most dependent variables, indicating adequate variability in participant ratings.**
