# Supplementary material
Source: Research Square preprint supplement (doi:10.21203/rs.3.rs-9232134/v1)
Supplement: Supplementary file 2 [file 3d200dde888059052b00833c.docx]

**APPENDIX 1: QUESTIONNAIRE LAYOUT**

**SECTION A (Mark with an X)**

| **1** | **Age** | *<20* | *20-35* | *36-50* | *51-65* | *>65* |  |
| --- | --- | --- | --- | --- | --- | --- | --- |
| **2** | **Gender** | *Male* | *Female* | *Prefer not to say* | *Other* |  | |
| **3** | **Highest level of education** | *Unschooled* | *Primary school* | *Secondary/High*  *school* | *Tertiary (College/*  *University)* |
| **4** | **Occupation: please specify** |  | | | | | |
| **5** | **Income level** | *<R50 000 per*  *year* | *R50 000- R200*  *000 per year* | *R200 000-R400*  *000 per year* | *R400 000-R600*  *000 per year* | *>R600 000 per*  *year* | *Undisclosed* |
| **6** | **Country/Province of residence: please specify** |  | | | | | |
| **7** | **Dietary preference** | *No preference* | *Preference for*  *meat* | *Vegetarian* | *Vegan* | *Other (specify)* | |

**SECTION B (Mark with an X)**

| 1 | **How would you rate your understanding of the**  **following ostrich production and management procedures?** | *Poor/ No knowledge* | *Limited* | *Moderate* | *Knowledgeable* | *Very knowledgeable* |
| --- | --- | --- | --- | --- | --- | --- |
|  | General ostrich husbandry |  |  |  |  |  |
| Transportation of ostriches |  |  |  |  |  |
| Handling of ostriches |  |  |  |  |  |
| Artificial incubation of eggs |  |  |  |  |  |
| Human rearing of chicks |  |  |  |  |  |
| 2 | **How important do you consider the following**  **factors for the well-being of ostriches?** | *Not important* | *Less important* | *Neutral* | *Important* | *Very important* |
|  | Feed availability |  |  |  |  |  |
| Feed quality |  |  |  |  |  |
| Water availability |  |  |  |  |  |
| Water quality |  |  |  |  |  |
| Chick housing |  |  |  |  |  |
| Shelters in outside camps |  |  |  |  |  |
| Stocking density |  |  |  |  |  |
| Body condition of ostriches |  |  |  |  |  |
| Internal parasites |  |  |  |  |  |
| External parasites |  |  |  |  |  |
| Limited stress |  |  |  |  |  |
| Absence of pain |  |  |  |  |  |
| Ability to exhibit natural behaviour |  |  |  |  |  |
| Freedom of movement |  |  |  |  |  |
| Environmental enrichment |  |  |  |  |  |

| **3** | **How important do you consider the following**  **management and production practises for the well-being of ostriches?** | *Not important* | *Less important* | *Neutral* | *Important* | *Very important* |
| --- | --- | --- | --- | --- | --- | --- |
|  | Manually assisting chicks to hatch |  |  |  |  |  |
| Human rearing of chicks (as opposed to natural rearing  of chicks by breeding birds) |  |  |  |  |  |
| Frequent visual inspection of ostriches |  |  |  |  |  |
| Regular handling of ostriches |  |  |  |  |  |
| Stockmanship skill/experience |  |  |  |  |  |
| Type of vehicle/trailer used for transporting ostriches |  |  |  |  |  |
| Isolation of sick/injured birds |  |  |  |  |  |
| Preventative medication |  |  |  |  |  |
| **4** | **How important do you think it is that people**  **involved in ostrich production are knowledgeable with regards to the following?** | *Not important* | *Less important* | *Neutral* | *Important* | *Very important* |
|  | Anatomy of ostriches |  |  |  |  |  |
| Behaviour of ostriches |  |  |  |  |  |
| Detecting signs of stress in ostriches |  |  |  |  |  |
| Detecting signs of disease/illness in ostriches |  |  |  |  |  |
| Handling and restraining of ostriches |  |  |  |  |  |
| Transporting of ostriches |  |  |  |  |  |
| **5** | **How important do you consider the following?** | *Not important* | *Less important* | *Neutral* | *Important* | *Very important* |
|  | The welfare of farmed ostriches |  |  |  |  |  |
| The welfare of slaughter animals for product quality |  |  |  |  |  |
| Animal welfare when buying animal products |  |  |  |  |  |
| Implementing a formal welfare protocol for the  production of ostriches (meat, leather, feathers) |  |  |  |  |  |

| **6** | **How likely are you to:** | *Not likely* | *Less likely* | *Neutral* | *Likely* | *Very likely* |
| --- | --- | --- | --- | --- | --- | --- |
|  | Buy a product that originates from a welfare conscious  farm rather than a product from a welfare neutral farm? |  |  |  |  |  |
| Pay more for a product that originates from a welfare  conscious farm and production line? |  |  |  |  |  |
| **7** | **Any additional comments?** |  | | | | |
