# Supplementary material
Source: Research Square preprint supplement (doi:10.21203/rs.3.rs-9232134/v1)
Supplement: Supplementary file 3 [file aaf4d55c1481ffcabdea873e.docx]

**Table 1: Socio-demographical distribution of South African participants according to category (consumers, farmers, and stakeholders). Participants' income levels were defined as follows: low-income (below R200 000 per year), medium-income (between R200 000 and R600 000 per year), and high-income (above R600 000 per year). Province of residence was defined as follows: with minimal to no ostrich production (i.e. Kwazulu-Natal, Gauteng, Mpumalanga, Northwest and Free State); province with moderate ostrich production (i.e Eastern Cape, Northern Cape and Limpopo); and Province with high ostrich production (i.e. Western Cape).**
